# Supplementary material for: Population norms of health-related quality of life in Moscow, Russia: the EQ-5D-5L-based survey
Source: Springer Nature journal article supplement (doi:10.1007/s11136-020-02705-0), 2020-11-25

## Electronic Supplementary Material

**Title:** Population norms of health-related quality of life in Moscow, Russia: the EQ-5D-5L-based survey

**Journal:** Quality of Life Research

### Authors

Malwina Hołownia-Voloskova, Alexey Tarbastaev, Dominik Golicki

### Table of Contents:

|                                                                                                                                                                  |    |
|------------------------------------------------------------------------------------------------------------------------------------------------------------------|----|
| Supplemental Fig. 1 Prevalence of health limitations (any level of severity) for EQ-5D-5L dimensions according to age group and sex: (A) males, (B) females..... | 2  |
| Supplemental Fig. 2 Distribution of (A) EQ-5D-5L index, (B) EQ VAS scores and (C) Level Sum Score among the Moscow population .....                              | 4  |
| Supplemental Table 1 Level Sum Score (LSS) according to age group and gender.....                                                                                | 5  |
| Supplemental Table 2 Any problems (%) within EQ-5D-5L dimensions according to level of education (secondary or primary, higher) and age group: both sexes .....  | 6  |
| Supplemental Table 3 Any problems (%) within EQ-5D-5L dimensions according to level of education (secondary or primary, higher) and age group: males.....        | 7  |
| Supplemental Table 4 Any problems (%) within EQ-5D-5L dimensions according to level of education (secondary or primary, higher) and age group: females .....     | 8  |
| Supplemental Table 5 EQ VAS according to level of education (secondary or primary, higher), age group and sex.....                                               | 9  |
| Supplemental Table 6 EQ-Index according to level of education (secondary or primary, higher), age group and sex.....                                             | 10 |
| Supplemental Table 7 Any problems (%) within EQ-5D-5L dimensions according to smoking status (current smoker, no smoking) and age group.....                     | 11 |
| Supplemental Table 8 EQ VAS and EQ-Index according to smoking status (current smoker, no smoking) and age group .....                                            | 12 |
| Supplemental Table 9 Any problems (%) within EQ-5D-5L dimensions according to income group.                                                                      | 13 |
| Supplemental Fig. 3 Any problems (%) within EQ-5D-5L dimensions according to monthly income group.....                                                           | 13 |
| Supplemental Fig. 4 EQ VAS according to monthly income group. ....                                                                                               | 14 |
| Supplemental Fig. 5 EQ-Index according to monthly income group.....                                                                                              | 14 |
| Supplemental Fig. 6 Any problems (%) within EQ-5D-5L dimensions according to Internet usage. ..                                                                  | 15 |
| Supplemental Fig. 7 EQ VAS according to Internet usage .....                                                                                                     | 15 |
| Supplemental Fig. 8 EQ-Index according to Internet usage.....                                                                                                    | 16 |

Supplemental Fig. 1 Prevalence of health limitations (any level of severity) for EQ-5D-5L dimensions according to age group and sex: (A) males, (B) females

A

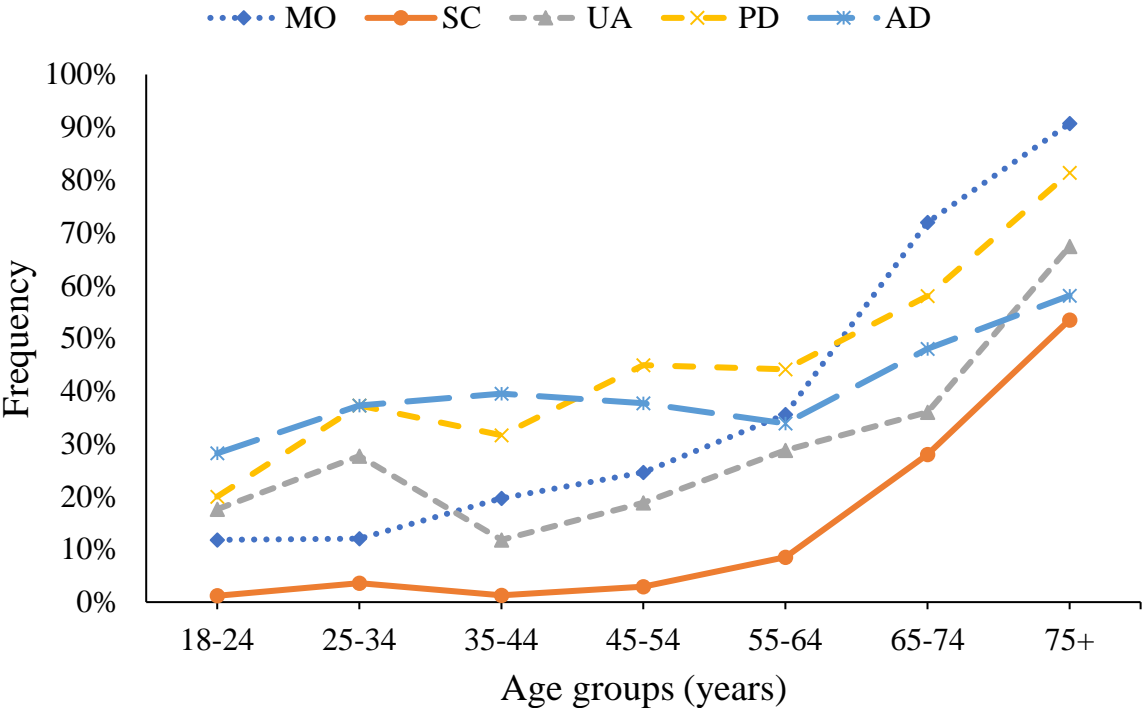

B

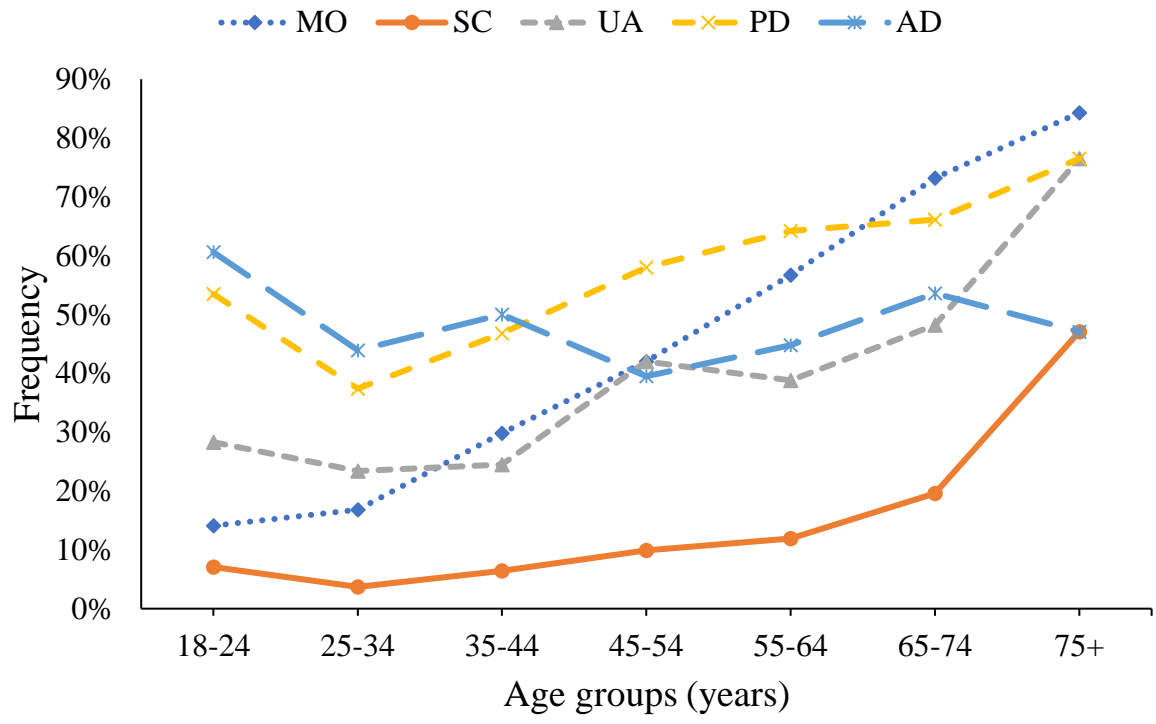

Supplemental Fig. 2 Distribution of (A) EQ-5D-5L index, (B) EQ VAS scores and (C) Level Sum Score among the Moscow population

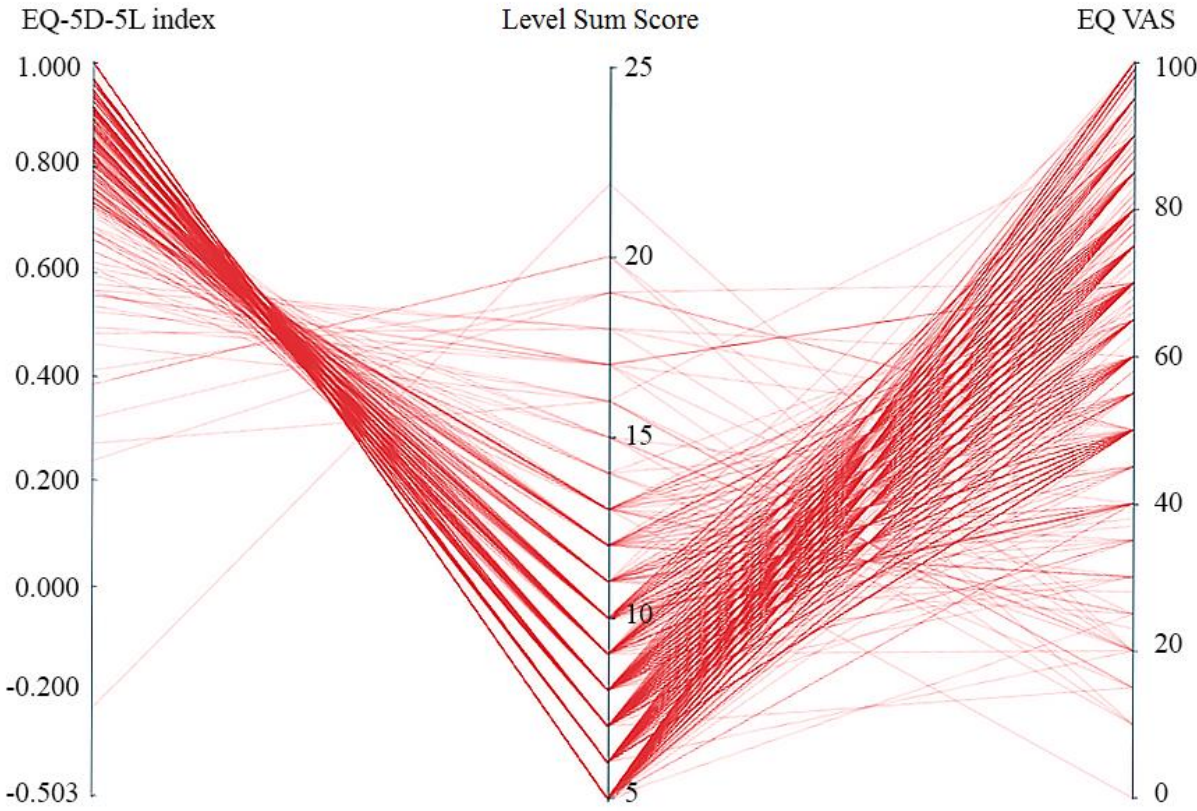

Supplemental Table 1 Level Sum Score (LSS) according to age group and gender

| Age group (years) | All  |                       | Male |                       | Female |                       |
|-------------------|------|-----------------------|------|-----------------------|--------|-----------------------|
|                   | n    | Mean (SD) [95%CI]     | n    | Mean (SD) [95%CI]     | n      | Mean (SD) [95%CI]     |
| All ages          | 1020 | 7.3 (2.6) [7.2–7.5]   | 465  | 7.0 (2.2) [6.7–7.2]   | 555    | 7.7 (2.8) [7.4–7.9]   |
| 18-24             | 184  | 6.5 (1.9) [6.3–6.8]   | 85   | 6.0 (1.4) [5.7–6.3]   | 99     | 7.0 (2.1) [6.6–7.4]   |
| 25-34             | 190  | 6.6 (1.9) [6.3–6.9]   | 83   | 6.6 (1.8) [6.2–7.0]   | 107    | 6.6 (2.0) [6.2–7.0]   |
| 35-44             | 170  | 6.6 (1.6) [6.3–6.8]   | 76   | 6.3 (1.5) [5.9–6.6]   | 94     | 6.8 (1.7) [6.5–7.2]   |
| 45-54             | 150  | 7.1 (2.1) [6.7–7.4]   | 69   | 6.6 (2.0) [6.2–7.1]   | 81     | 7.4 (2.1) [7.0–7.9]   |
| 55-64             | 126  | 7.4 (2.1) [7.0–7.8]   | 59   | 6.8 (1.6) [6.4–7.2]   | 67     | 7.9 (2.3) [7.3–7.6]   |
| 65-74             | 106  | 8.7 (2.9) [8.2–9.3]   | 50   | 8.1 (2.1) [7.5–8.7]   | 56     | 9.3 (3.5) [8.3–10.2]  |
| 75+               | 94   | 10.7 (3.6) [9.9–11.4] | 43   | 10.2 (2.8) [9.3–11.0] | 51     | 11.0 (4.2) [9.9–12.2] |

Supplemental Table 2 Any problems (%) within EQ-5D-5L dimensions according to the level of education (secondary or primary, higher) and age group: both sexes

| Both sexes                                                   | All ages | Age group   |             |             |           |
|--------------------------------------------------------------|----------|-------------|-------------|-------------|-----------|
|                                                              |          | 18-24 years | 25-44 years | 45-64 years | 65+ years |
| Secondary or primary education                               |          |             |             |             |           |
| MO                                                           | 37.2     | 12.5        | 29.3        | 42.3        | 89.7      |
| SC                                                           | 11.3     | 14.2        | 8.5         | 9.8         | 32.4      |
| UA                                                           | 33.8     | 23.6        | 26.8        | 33.3        | 64.7      |
| PD                                                           | 49.9     | 44.0        | 45.1        | 53.7        | 82.4      |
| AD                                                           | 42.2     | 40.3        | 39.0        | 37.4        | 58.8      |
| Higher education                                             |          |             |             |             |           |
| MO                                                           | 34.9     | 15.0        | 17.0        | 37.9        | 75.4      |
| SC                                                           | 11.7     | 5.0         | 2.5         | 7.2         | 38.5      |
| UA                                                           | 30.6     | 12.5        | 20.7        | 32.0        | 52.3      |
| PD                                                           | 47.9     | 52.5        | 37.0        | 52.9        | 63.8      |
| AD                                                           | 45.4     | 65.0        | 44.2        | 40.5        | 47.7      |
| Difference (secondary/primary education - higher education)* |          |             |             |             |           |
| MO                                                           | 2.3      | -2.5        | 12.3        | 4.4         | 14.3      |
| SC                                                           | -0.4     | 9.2         | 6.0         | 2.6         | -6.1      |
| UA                                                           | 3.2      | 11.1        | 6.1         | 1.3         | 12.4      |
| PD                                                           | 2.0      | -8.5        | 8.1         | 0.8         | 18.6      |
| AD                                                           | -3.2     | -24.7       | -5.2        | -3.1        | 11.1      |

\* Green colour means that respondents with higher education have less problems than respondents with secondary/primary education. Red colour means the opposite - respondents with higher education have more problems than respondents with secondary/primary education.

Supplemental Table 3 Any problems (%) within EQ-5D-5L dimensions according to the level of education (secondary or primary, higher) and age group: males

| Males                                              | All ages | Age group   |             |             |           |
|----------------------------------------------------|----------|-------------|-------------|-------------|-----------|
|                                                    |          | 18-24 years | 25-44 years | 45-64 years | 65+ years |
| Secondary or primary education                     |          |             |             |             |           |
| MO                                                 | 31.3     | 11.3        | 29.5        | 30.2        | 88.9      |
| SC                                                 | 7.3      | 0.0         | 2.3         | 6.3         | 37.0      |
| UA                                                 | 26.3     | 16.9        | 25.0        | 23.8        | 59.3      |
| PD                                                 | 40.0     | 18.3        | 45.5        | 41.3        | 85.2      |
| AD                                                 | 33.2     | 25.4        | 31.8        | 33.3        | 55.6      |
| Higher education                                   |          |             |             |             |           |
| MO                                                 | 32.4     | 14.3        | 10.4        | 29.2        | 78.5      |
| SC                                                 | 13.1     | 7.1         | 2.6         | 4.6         | 41.5      |
| UA                                                 | 17.0     | 21.4        | 18.3        | 23.1        | 47.7      |
| PD                                                 | 42.5     | 28.6        | 30.4        | 47.7        | 61.5      |
| AD                                                 | 43.2     | 42.9        | 40.9        | 38.5        | 52.3      |
| Difference (secondary/primary - higher education)* |          |             |             |             |           |
| MO                                                 | -1.1     | -3.0        | 19.1        | 1.0         | 10.4      |
| SC                                                 | -5.8     | -7.1        | -0.3        | 1.7         | -4.5      |
| UA                                                 | 9.3      | -4.5        | 6.7         | 0.7         | 11.6      |
| PD                                                 | -2.5     | -10.3       | 15.1        | -6.4        | 23.7      |
| AD                                                 | -10.0    | -17.5       | -9.1        | -5.2        | 3.3       |

\* Green colour means that respondents with higher education have less problems than respondents with secondary/primary education. Red colour means the opposite - respondents with higher education have more problems than respondents with secondary/primary education.

Supplemental Table 4 Any problems (%) within EQ-5D-5L dimensions according to the level of education (secondary or primary, higher) and age group: females

| Females                                           | All ages | Age group   |             |             |           |
|---------------------------------------------------|----------|-------------|-------------|-------------|-----------|
|                                                   |          | 18-24 years | 25-44 years | 45-64 years | 65+ years |
| Secondary or primary education                    |          |             |             |             |           |
| MO                                                | 42.9     | 13.7        | 28.9        | 55.0        | 90.2      |
| SC                                                | 15.1     | 8.2         | 15.8        | 13.3        | 29.3      |
| UA                                                | 41.0     | 30.1        | 28.9        | 43.3        | 68.3      |
| PD                                                | 59.4     | 50.7        | 44.7        | 66.6        | 80.5      |
| AD                                                | 50.9     | 54.8        | 47.4        | 41.7        | 61.0      |
| Higher education                                  |          |             |             |             |           |
| MO                                                | 36.8     | 15.4        | 21.7        | 44.3        | 72.3      |
| SC                                                | 10.6     | 3.8         | 2.5         | 9.1         | 35.4      |
| UA                                                | 33.3     | 23.1        | 2.4         | 38.6        | 56.9      |
| PD                                                | 52.1     | 65.4        | 41.6        | 43.2        | 66.2      |
| AD                                                | 47.1     | 76.9        | 46.6        | 42.0        | 43.1      |
| Difference (secondary/primary - higher education) |          |             |             |             |           |
| MO                                                | 6.1      | -1.7        | 7.2         | 10.7        | 17.9      |
| SC                                                | 4.5      | 4.4         | 13.3        | 4.2         | -6.1      |
| UA                                                | 7.7      | 7.0         | 26.5        | 4.7         | 11.4      |
| PD                                                | 7.3      | -14.7       | 3.1         | 23.4        | 14.3      |
| AD                                                | 3.8      | -22.1       | 0.8         | -0.3        | 17.9      |

\* Green colour means that respondents with higher education have less problems than respondents with secondary/primary education. Red colour means the opposite - respondents with higher education have more problems than respondents with secondary/primary education.



Supplemental Table 5 EQ VAS according to the level of education (secondary or primary, higher), age group and sex

|                                          | All ages    | Age group   |             |             |             |
|------------------------------------------|-------------|-------------|-------------|-------------|-------------|
|                                          |             | 18-24 years | 25-44 years | 45-64 years | 65+ years   |
| <b>Both sexes</b>                        |             |             |             |             |             |
| Secondary or primary education           | 73.2 (19.2) | 78.4 (15.8) | 76.3 (16.6) | 74.0 (18.9) | 56.8 (20.7) |
| Higher education                         | 74.6 (15.9) | 79.8 (10.7) | 79.7 (12.7) | 75.5 (13.5) | 61.4 (18.4) |
| Difference (higher – secondary/primary)* | 1.4         | 1.4         | 3.4         | 1.5         | 4.6         |
| <b>Males</b>                             |             |             |             |             |             |
| Secondary or primary education           | 76.2 (18.5) | 83.1 (12.4) | 76.3 (16.7) | 76.8 (18.7) | 56.3 (21.3) |
| Higher education                         | 74.6 (16.5) | 83.9 (11.0) | 80.9 (11.6) | 74.8 (13.5) | 61.0 (19.3) |
| Difference (higher – secondary/primary)* | -1.6        | 0.8         | 4.6         | -2.0        | 4.7         |
| <b>Females</b>                           |             |             |             |             |             |
| Secondary or primary education           | 70.3 (19.4) | 73.9 (17.5) | 76.3 (16.8) | 71.1 (18.8) | 57.1 (20.6) |
| Higher education                         | 74.7 (15.5) | 77.6 (10.1) | 78.8 (13.4) | 76.0 (13.6) | 61.8 (17.7) |
| Difference (higher – secondary/primary)* | 4.4         | 3.7         | 2.5         | 4.9         | 4.7         |

\* Green colour means that respondents with higher education have higher EQ VAS values than respondents with secondary/primary education.

Red colour means the opposite - respondents with higher education have lower EQ VAS values than respondents with secondary/primary education.

Supplemental Table 6 EQ-5D-5L index according to the level of education (secondary or primary, higher), age group and sex

|                                          | All ages      | Age group     |               |               |               |
|------------------------------------------|---------------|---------------|---------------|---------------|---------------|
|                                          |               | 18-24 years   | 25-44 years   | 45-64 years   | 65+ years     |
| <b>Both sexes</b>                        |               |               |               |               |               |
| Secondary or primary education           | 0.901 (0.121) | 0.936 (0.096) | 0.925 (0.080) | 0.907 (0.097) | 0.784 (0.171) |
| Higher education                         | 0.911 (0.094) | 0.925 (0.061) | 0.942 (0.065) | 0.916 (0.068) | 0.837 (0.135) |
| Difference (higher – secondary/primary)* | 0.010         | -0.011        | 0.017         | 0.009         | 0.053         |
| <b>Males</b>                             |               |               |               |               |               |
| Secondary or primary education           | 0.927 (0.085) | 0.963 (0.057) | 0.932 (0.072) | 0.930 (0.077) | 0.821 (0.102) |
| Higher education                         | 0.921 (0.082) | 0.949 (0.049) | 0.949 (0.063) | 0.933 (0.063) | 0.852 (0.094) |
| Difference (higher – secondary/primary)* | -0.006        | -0.014        | 0.017         | 0.003         | 0.031         |
| <b>Females</b>                           |               |               |               |               |               |
| Secondary or primary education           | 0.875 (0.143) | 0.911 (0.118) | 0.916 (0.088) | 0.883 (0.109) | 0.760 (0.202) |
| Higher education                         | 0.904 (0.103) | 0.913 (0.064) | 0.937 (0.065) | 0.903 (0.069) | 0.822 (0.165) |
| Difference (higher – secondary/primary)* | 0.029         | 0.002         | 0.021         | 0.020         | 0.062         |

\* Green colour means that respondents with higher education have higher EQ-5D-5L index values than respondents with secondary/primary education.

Red colour means the opposite - respondents with higher education have lower EQ-5D-5L index values than respondents with secondary/primary education.

Supplemental Table 7 Any problems (%) within EQ-5D-5L dimensions according to smoking status (current smoker, no smoking) and age group

|                                                  | All ages | Age group   |             |             |           |
|--------------------------------------------------|----------|-------------|-------------|-------------|-----------|
|                                                  |          | 18-24 years | 25-44 years | 45-64 years | 65+ years |
| <b>Current smoker</b>                            |          |             |             |             |           |
| MO                                               | 30.1     | 18.5        | 21.9        | 29.1        | 86.2      |
| SC                                               | 10.1     | 1.9         | 5.3         | 12.7        | 37.9      |
| UA                                               | 31.9     | 37.0        | 26.3        | 31.6        | 44.8      |
| PD                                               | 42.0     | 35.2        | 36.0        | 43.0        | 75.9      |
| AD                                               | 41.3     | 50.0        | 38.6        | 34.2        | 55.2      |
| <b>No smoking</b>                                |          |             |             |             |           |
| MO                                               | 38.0     | 10.9        | 18.9        | 44.2        | 79.6      |
| SC                                               | 12.1     | 15.5        | 3.3         | 6.6         | 36.5      |
| UA                                               | 32.1     | 18.0        | 20.1        | 33.0        | 59.3      |
| PD                                               | 51.5     | 39.8        | 40.2        | 57.4        | 70.1      |
| AD                                               | 45.4     | 44.5        | 45.1        | 41.1        | 51.5      |
| <b>Difference (current smoker - no smoking)*</b> |          |             |             |             |           |
| MO                                               | -7.9     | 7.6         | 3.0         | -15.1       | 6.6       |
| SC                                               | -2.0     | -13.6       | 2.0         | 6.1         | 1.4       |
| UA                                               | -0.2     | 19.0        | 6.2         | -1.4        | -14.5     |
| PD                                               | -9.5     | -4.6        | -4.2        | -14.4       | 5.8       |
| AD                                               | -4.1     | 5.5         | -6.5        | -6.9        | 3.7       |

\* Green colour means that non-smoking respondents have less problems than current smokers.

Red colour means the opposite - non-smoking respondents have more problems than current smokers.

Supplemental Table 8 EQ VAS and EQ-5D-5L index according to smoking status (current smoker, no smoking) and age group

|                                           | All ages      | Age group     |               |               |               |
|-------------------------------------------|---------------|---------------|---------------|---------------|---------------|
|                                           |               | 18-24 years   | 25-44 years   | 45-64 years   | 65+ years     |
| EQ VAS, mean (SD)                         |               |               |               |               |               |
| Current smoker                            | 76.2 (18.1)   | 78.6 (16.5)   | 79.2 (15.5)   | 78.4 (15.2)   | 53.6 (22.0)   |
| Non-smoker                                | 73.2 (17.0)   | 78.7 (14.2)   | 78.8 (12.9)   | 73.4 (16.2)   | 60.8 (18.8)   |
| Difference (non-smoker - current smoker)* | -3.0          | 0.1           | -0.4          | -5.0          | 7.2           |
| EQ-5D-5L index, mean (SD)                 |               |               |               |               |               |
| Current smoker                            | 0.914 (0.101) | 0.911 (0.127) | 0.934 (0.077) | 0.919 (0.092) | 0.828 (0.113) |
| Non-smoker                                | 0.904 (0.108) | 0.943 (0.067) | 0.940 (0.064) | 0.909 (0.078) | 0.815 (0.156) |
| Difference (non-smoker - current smoker)* | -0.010        | 0.032         | 0.006         | -0.010        | -0.013        |

\* Green colour means that non-smokers have higher EQ VAS / EQ-5D-5L index values than current smokers.

Red colour means the opposite - non-smokers have lower EQ VAS / EQ-5D-5L index values than current smokers.

Supplemental Table 9 Any problems (%) within EQ-5D-5L dimensions according to monthly income group

| EQ-5D-5L dimension | Monthly income level (RUB) |               |               |               |         | Refused to answer |
|--------------------|----------------------------|---------------|---------------|---------------|---------|-------------------|
|                    | ≤15,000                    | 15,001-30,000 | 30,001-50,000 | 50,001-80,000 | >80,000 |                   |
| MO                 | 39.2                       | 53.7          | 36.2          | 32.0          | 17.6    | 27.3              |
| SC                 | 16.7                       | 22.4          | 5.7           | 4.1           | 6.1     | 9.7               |
| UA                 | 32.4                       | 44.3          | 39.1          | 29.9          | 14.5    | 23.6              |
| PD                 | 47.1                       | 59.8          | 52.3          | 44.9          | 38.2    | 43.1              |
| AD                 | 50.0                       | 49.2          | 43.1          | 36.7          | 50.4    | 37.5              |

Supplemental Fig. 3 Any problems (%) within EQ-5D-5L dimensions according to monthly income group

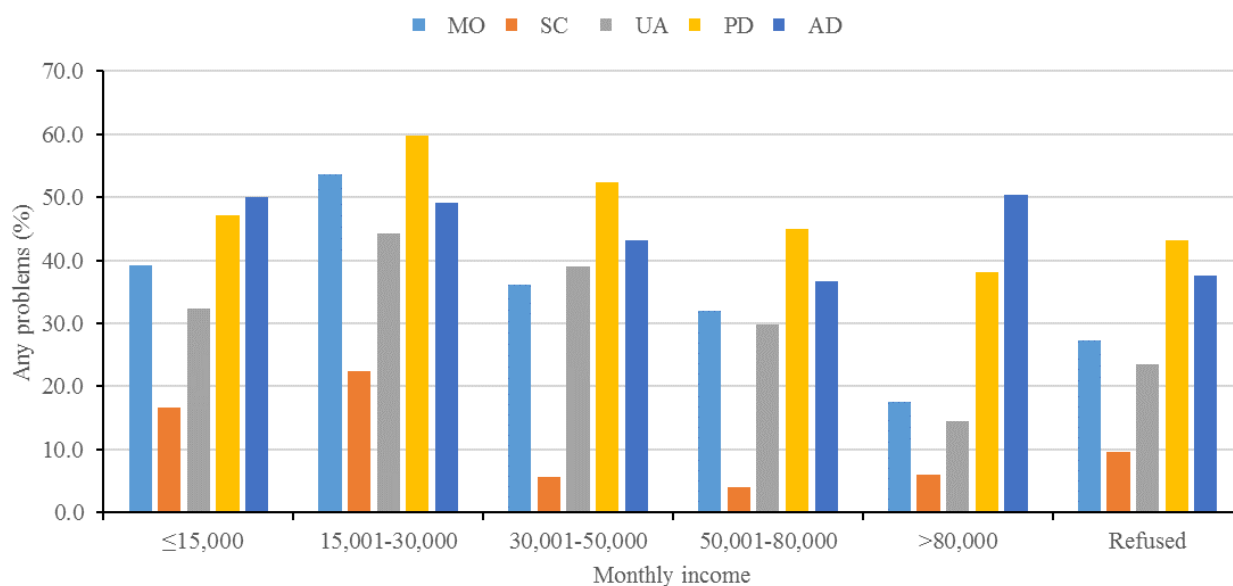

Supplemental Fig. 4 EQ VAS according to monthly income group

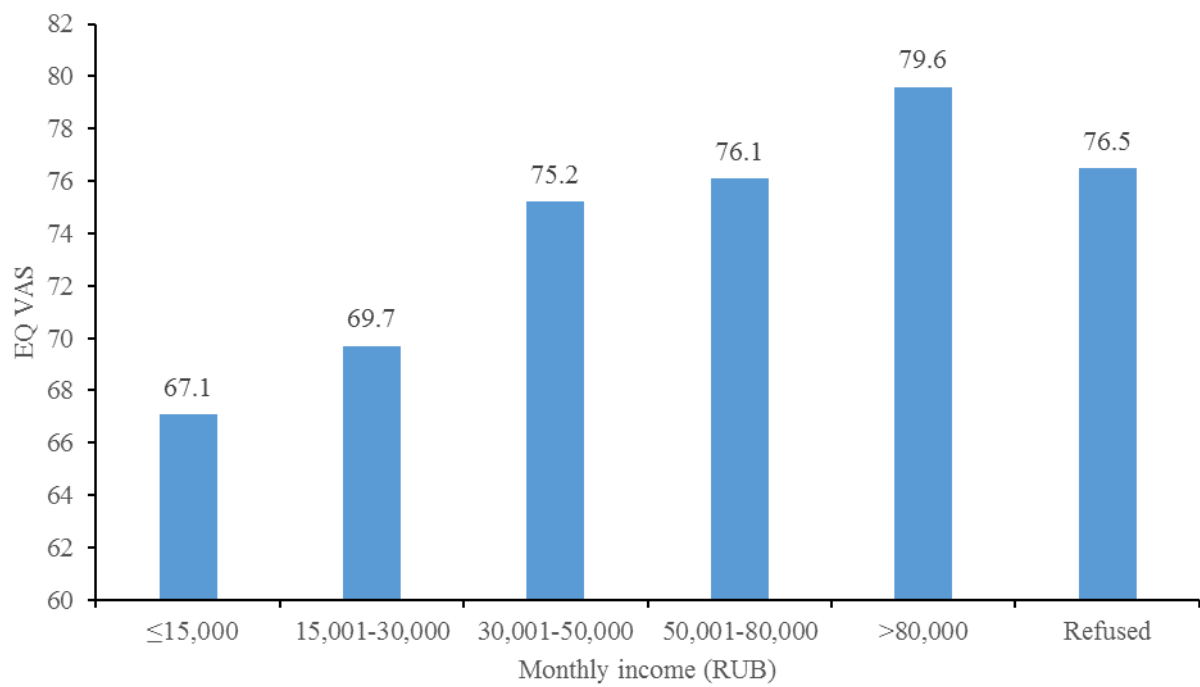

Supplemental Fig. 5 EQ-5D-5L index according to monthly income group

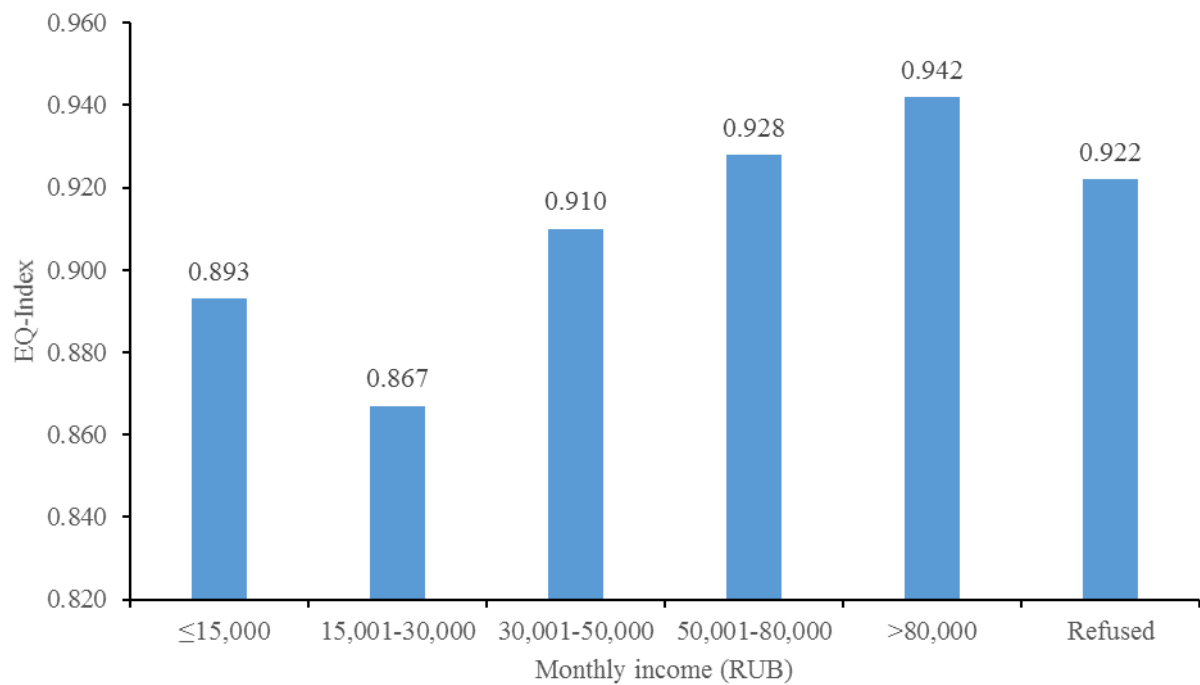

Supplemental Fig. 6 Any problems (%) within EQ-5D-5L dimensions according to Internet usage

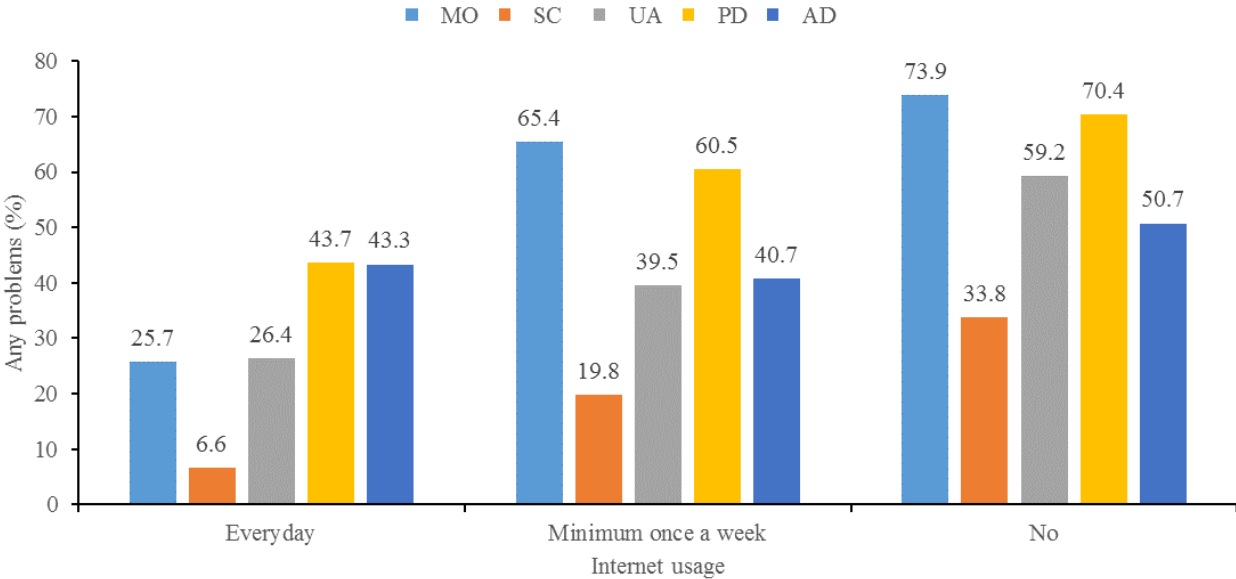

Supplemental Fig. 7 EQ VAS according to Internet usage

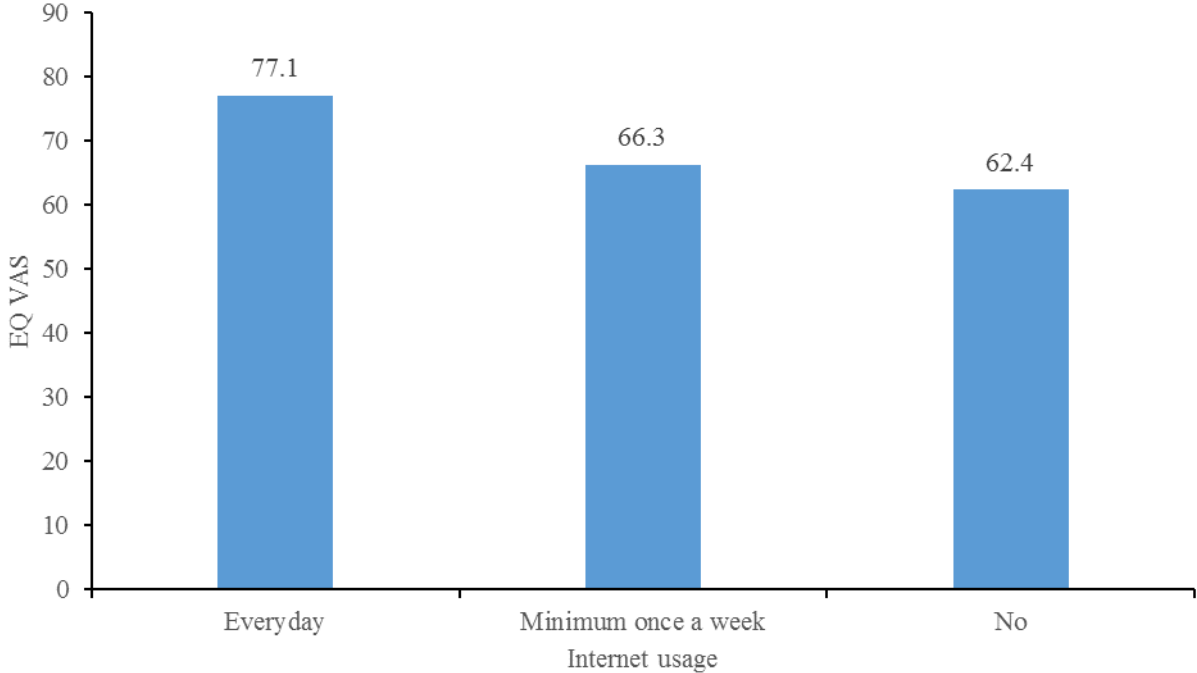

Supplemental Fig. 8 EQ-5D-5L index according to Internet usage

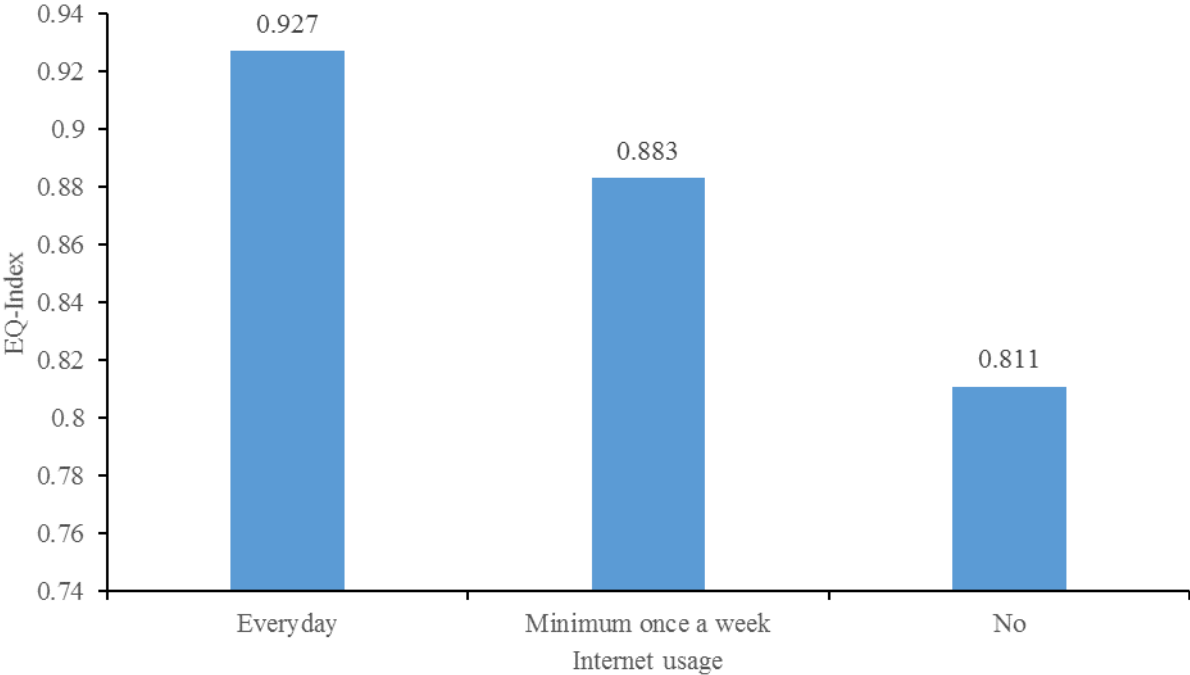

Supplement: MOESM1 [file 18626560]
